# Supplementary material for: A transparent, flexible, ion conductive, and luminescent PMMA ionogel based on a Pt/Eu bimetallic complex and the ionic liquid [Bmim][N(Tf)2]
Source: Royal Society of Chemistry journal article supplement (doi:10.1039/c2jm15862k), 2012-01-01
Supplement: c2jm15862k.pdf [file c2jm15862k.pdf]

## Supporting Information

Zai-Lai Xie,<sup>1</sup> Hai-Bing Xu,<sup>2</sup> André Geßner,<sup>1</sup> Michael U. Kumke,<sup>1</sup> and Andreas Taubert<sup>1,3,\*</sup>

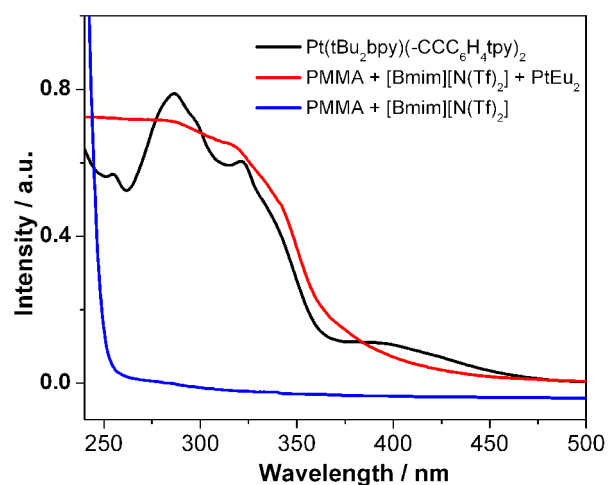

**Figure S1.** UV-Vis electronic absorption spectra of (Bu<sup>t</sup><sub>2</sub>bpy)Pt(C≡CC<sub>6</sub>H<sub>4</sub>tpy) and ionogels.

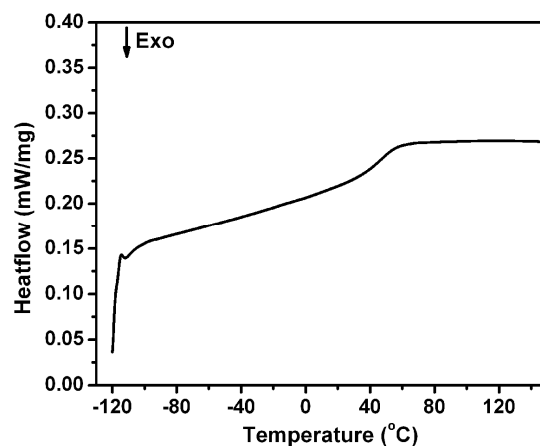

**Figure S2.** Full DSC curve of an ionogel.

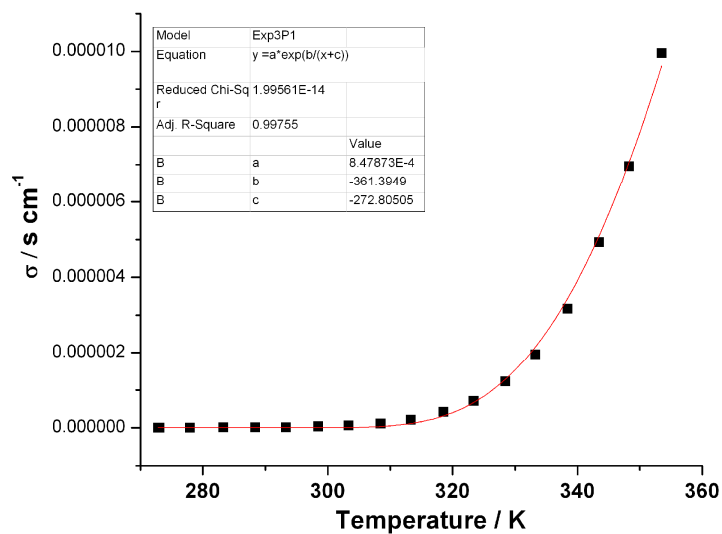

**Figure S3.** VTF fit of the ionic conductivity data.

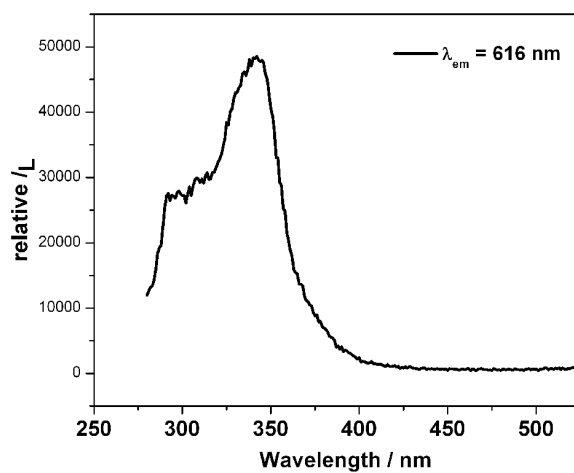

**Figure S4.** Excitation spectrum of the PtEu<sub>2</sub>-ionogel.
